# Supplementary material for: Radiation-induced injury on surgical margins: a clue to anastomotic leakage after rectal-cancer resection with neoadjuvant chemoradiotherapy?
Source: PubMed Central journal article supplement — Gastroenterol Rep (Oxf). 2018 Dec 11;7(2):98–106. doi: 10.1093/gastro/goy042 (PMC6454846; doi:10.1093/gastro/goy042), 2018-12-11
Supplement: goy042_supplementary_data.pdf [file goy042_supplementary_data.pdf]

## Supplementary Data

**Table 1.** Consistency between double assessments for histopathologic scoring and microvessel density

| Variable                               | Dr. YZ & XF/PW | Dr. YH     | ICC   | 95% CI      |
|----------------------------------------|----------------|------------|-------|-------------|
| <b>Total histopathologic score</b>     |                |            |       |             |
| Proximal margin                        | 1 (0-8)        | 1 (0-6)    | 0.935 | 0.912-0.953 |
| Distal margin                          | 1 (0-9)        | 1 (0-8)    | 0.962 | 0.947-0.972 |
| <b>Microvessel density<sup>a</sup></b> |                |            |       |             |
| Proximal margin                        | 25.3 ± 8.9     | 24.0 ± 9.3 | 0.787 | 0.710-0.844 |
| Distal margin                          | 22.7 ± 10.6    | 23.9 ± 8.7 | 0.756 | 0.667-0.821 |

Data are expressed as median (range) or mean ± standard deviation.

ICC, intraclass correlation coefficient; CI, confidence interval.

<sup>a</sup>Microvessel counts per 200× field.

**Table 2.** Histopathologic scoring for resection margins in three treatment groups after propensity score matching

| <b>Variable</b>                                            | <b>nCRT group<br/>(n = 48)</b> | <b>nCT group<br/>(n = 48)</b> | <b>Control group<br/>(n = 48)</b> | <b>P-value</b> |
|------------------------------------------------------------|--------------------------------|-------------------------------|-----------------------------------|----------------|
| <b>Score for mucosal erosions/ulcerations</b>              |                                |                               |                                   |                |
| Proximal margin                                            | 0 (0-1)                        | 0 (0-1)                       | 0 (0-1)                           | 0.244          |
| Distal margin                                              | 0 (0-1)                        | 0 (0-1)                       | 0 (0-1)                           | 0.613          |
| <b>Score for nuclear abnormalities of epithelial cells</b> |                                |                               |                                   |                |
| Proximal margin                                            | 0 (0-1)                        | 0 (0-1)                       | 0 (0-0)                           | 0.360          |
| Distal margin                                              | 0 (0-1)                        | 0 (0-1)                       | 0 (0-0)                           | 0.363          |
| <b>Score for crypt disarrangement</b>                      |                                |                               |                                   |                |
| Proximal margin                                            | 0 (0-2)                        | 0 (0-1)                       | 0 (0-0)                           | < 0.001        |
| Distal margin                                              | 1 (0-2)                        | 0 (0-2)                       | 0 (0-2)                           | < 0.001        |
| <b>Score for mucosal inflammatory infiltrate</b>           |                                |                               |                                   |                |
| Proximal margin                                            | 1 (0-2)                        | 0 (0-1)                       | 0 (0-1)                           | < 0.001        |
| Distal margin                                              | 1 (0-2)                        | 0 (0-1)                       | 0 (0-1)                           | < 0.001        |
| <b>Score for mucosal edema</b>                             |                                |                               |                                   |                |
| Proximal margin                                            | 0 (0-1)                        | 0 (0-1)                       | 0 (0-1)                           | 0.444          |
| Distal margin                                              | 0 (0-1)                        | 0 (0-1)                       | 0 (0-1)                           | 0.474          |
| <b>Score for fibrosis of the lamina propria</b>            |                                |                               |                                   |                |
| Proximal margin                                            | 0 (0-1)                        | 0 (0-0)                       | 0 (0-0)                           | < 0.001        |
| Distal margin                                              | 1 (0-1)                        | 0 (0-1)                       | 0 (0-0)                           | < 0.001        |
| <b>Score for fibrosis of submucosa</b>                     |                                |                               |                                   |                |
| Proximal margin                                            | 1 (0-2)                        | 0 (0-1)                       | 0 (0-1)                           | < 0.001        |
| Distal margin                                              | 1 (0-3)                        | 0 (0-1)                       | 0 (0-1)                           | < 0.001        |
| <b>Score for sclerosis of submucosal vessels</b>           |                                |                               |                                   |                |
| Proximal margin                                            | 0 (0-1)                        | 0 (0-0)                       | 0 (0-0)                           | < 0.001        |
| Distal margin                                              | 1 (0-3)                        | 0 (0-1)                       | 0 (0-0)                           | < 0.001        |
| <b>Score for lymph congestion</b>                          |                                |                               |                                   |                |
| Proximal margin                                            | 0 (0-1)                        | 0 (0-1)                       | 0 (0-1)                           | 0.756          |
| Distal margin                                              | 0 (0-1)                        | 0 (0-1)                       | 0 (0-1)                           | 0.025          |
| <b>Total histopathologic score</b>                         |                                |                               |                                   |                |
| Proximal margin                                            | 3 (0-8)                        | 0 (0-3)                       | 0 (0-2)                           | < 0.001        |
| Distal margin                                              | 4 (2-9)                        | 0 (0-4)                       | 0 (0-3)                           | < 0.001        |

Data are expressed as median (range).

nCRT, neoadjuvant chemoradiotherapy; nCT, neoadjuvant chemotherapy.

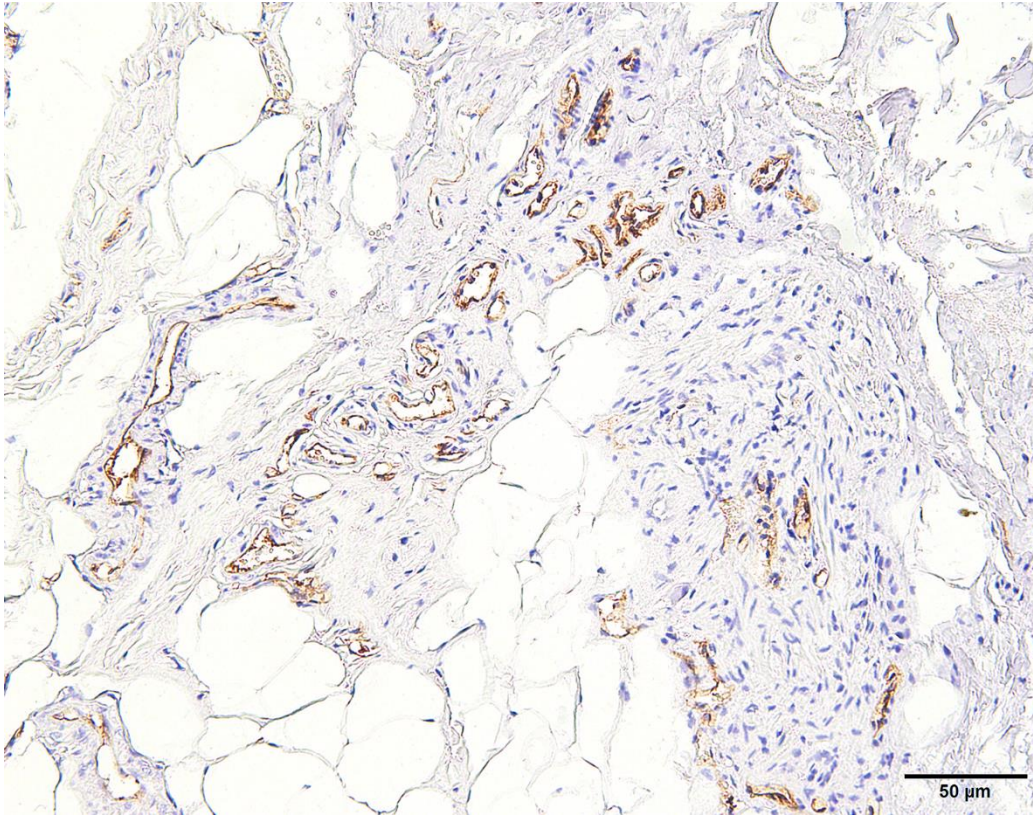

**Figure 1.** Submucosal microvessels stained for CD31

Tissue is immunostained for CD31. A brown-stained cell or cluster indicates a single microvessel. 46 microvessels were counted on this 200× field.
